# Supplementary material
Source: PubMed Central journal article supplement (PMC4908999)
Supplement: 13337_2016_321_MOESM1_ESM.pdf [file 13337_2016_321_MOESM1_ESM.pdf]

**Antiviral activity of the Oseltamivir and *Melissa officinalis* L. essential oil against avian influenza A virus (H9N2)**

**VirusDisease**

Pourghanbari Gholamhosein<sup>1,2\*</sup>, Nili. Hasan<sup>2</sup>, Moattari Afagh<sup>3</sup>, Mohammadi Ali<sup>4</sup>, Iraj Aida<sup>5</sup>

1. Department of Clinical Science, School Of Veterinary Medicine, Ardakan University, Ardakan, Yazd, Iran.
2. Avian Disease Research Center, School of Veterinary Medicine, Shiraz University, Shiraz, Iran.
3. Department of Bacteriology and Virology, Shiraz University of Medical Science, Shiraz, Iran.
4. Department of Pathobiology, School of Veterinary Medicine, Shiraz University, Shiraz, Iran
5. Central Research Laboratory, Shiraz University of Medical Sciences, Shiraz, Iran.

**Corresponding Author at:** Pourghanbari GH, Department Of Avian Medicine, School Of Veterinary Medicine, Ardakan University, Ardakan, Yazd, Iran.

**Tel:** 0098-3532240916

**Fax:** 0098-3532248384

**E-mail Address:** [Hpourghanbari@ardakan.ac.ir](mailto:Hpourghanbari@ardakan.ac.ir)

**Table I.** Chemical composition of *Melissa officinalis* essential oil

| Peak | Compound                                                | Area (%) | KI <sup>a</sup> |
|------|---------------------------------------------------------|----------|-----------------|
| 1    | Linalool                                                | 1.879081 | 1084            |
| 2    | Citronellal                                             | 0.714051 | 1129            |
| 3    | Isopulegol-iso                                          | 2.466294 | 1159            |
| 4    | Neral                                                   | 19.19012 | 1220            |
| 5    | Geranial                                                | 26.80979 | 1251            |
| 6    | Methyl geranate                                         | 0.648283 | 1300            |
| 7    | Geranyl acetate                                         | 4.566167 | 1361            |
| 8    | Unknown                                                 | 0.850284 | 1368            |
| 9    | Caryophyllene-E                                         | 11.34965 | 1415            |
| 10   | Humulene- $\alpha$                                      | 1.052285 | 1445            |
| 11   | Amorphene- $\delta$                                     | 0.436886 | 1511            |
| 12   | Caryophyllene oxide                                     | 11.8523  | 1566            |
| 13   | Viridiflorol                                            | 1.916663 | 1574            |
| 14   | Humulene-epoxide II                                     | 0.671772 | 1586            |
| 15   | Caryophylla-4(12),8(13)-dien-5 $\alpha$ -ol             | 0.742237 | 1613            |
| 16   | Unknown                                                 | 1.263682 | 1648            |
| 17   | Tetradecanoic acid                                      | 0.714051 | 1747            |
| 18   | 1,2-Benzenedicarboxylic acid, bis(2-methylpropyl) ester | 0.197304 | 1822            |
| 19   | 2-Pentadecanone, 6,10,14-trimethyl-                     | 0.610701 | 1829            |
| 20   | N-Hexadecanoic acid                                     | 8.427679 | 1958            |
| 21   | 13-Epimanool                                            | 1.592521 | 2032            |
| 22   | 1,3,5-Cycloheptatriene, 2,4-dihexyl-7,7-dimethyl        | 1.10396  | 2081            |
| 23   | Phytol                                                  | 0.944238 | 2097            |
